# Supplementary material
Source: Springer Nature journal article supplement (https://www.springermedizin.de/resource/supplementary/12963_2008_77_MOESM1_ESM.pdf/9572642)
Supplement: MOESM1 [file 9572642]

---

| Period                       | Average perspective                               | Deprivation perspective                                      | Inequality perspective                                                                             |
|------------------------------|---------------------------------------------------|--------------------------------------------------------------|----------------------------------------------------------------------------------------------------|
| One period (cross-sectional) | - What is the national average?                   | - Who shows the highest level of risk factors?               | - What is the disparity between the least healthy and healthiest?                                  |
| Over time (longitudinal)     | - How has the national average changed over time? | - Has the situation of the most deprived improved over time? | - Has the difference between the least healthy and the healthiest narrowed or increased over time? |

---

*Adapted from: UNDP. (2000). Human Development Report. New York: Oxford University Press. See also De Maio et al [6].*
